# Supplementary material for: Fbxo4-mediated degradation of Fxr1 suppresses tumorigenesis in head and neck squamous cell carcinoma
Source: PubMed Central journal article supplement (PMC5688124; doi:10.1038/s41467-017-01199-8), 2017-11-16
Supplement: 41467_2017_1199_MOESM3_ESM.pdf [file 41467_2017_1199_MOESM3_ESM.pdf]

## **Description of Additional Supplementary Files**

File Name: Supplementary Data 1

Description: C1\_243 ClusPro bimolecular docking of Fbxo4 with Fxr1.

File Name: Supplementary Data 2

Description: C2\_90 ClusPro bimolecular docking of Fbxo4 with Fxr1.

File Name: Supplementary Data 3

Description: C3\_86 ClusPro bimolecular docking of Fbxo4 with Fxr1.

File Name: Supplementary Data 4

Description: C4\_60 ClusPro bimolecular docking of Fbxo4 with Fxr1.

File Name: Supplementary Data 5

Description: C5\_49 ClusPro bimolecular docking of Fbxo4 with Fxr1.

File Name: Supplementary Data 6

Description: C6\_48 ClusPro bimolecular docking of Fbxo4 with Fxr1.

File Name: Supplementary Data 7

Description: C7\_42 ClusPro bimolecular docking of Fbxo4 with Fxr1.

File Name: Supplementary Data 8

Description: C8\_40 ClusPro bimolecular docking of Fbxo4 with Fxr1.

File Name: Supplementary Data 9

Description: C9\_34 ClusPro bimolecular docking of Fbxo4 with Fxr1.

File Name: Supplementary Data 10

Description: C10\_29 ClusPro bimolecular docking of Fbxo4 with Fxr1.

File Name: Supplementary Data 11

Description: Predicted AREs in 3'-UTR of Human Fbxo4 mRNA.
